# Supplementary material for: Zinc(ii)-catalyzed reactions of carbon dioxide and propargylic alcohols to carbonates at room temperature
Source: Royal Society of Chemistry journal article supplement (doi:10.1039/c5gc01870f), 2015-08-21

Supporting Information

**Zinc(II)-Catalyzed Reactions of Carbon Dioxide and Propargylic  
Alcohols to Carbonates at Room Temperature**

Jiayin Hu, Jun Ma\*, Qinggong Zhu, Qingli Qian, Hongling Han, Qingqing Mei, Buxing Han\*

Beijing National Laboratory for Molecular Sciences, Institute of Chemistry, Chinese Academy of Sciences, Beijing 100190, PR China; Tel: (+) 86-10-62562821; E-mail: majun@iccas.ac.cn; hanbx@iccas.ac.cn.

**Contents**

|                          |   |
|--------------------------|---|
| 1. General               |   |
| 2. Experimental results  |   |
| 2.1. Figures S1-S3 ..... | 2 |
| 2.2. Products .....      | 4 |
| 3. NMR Spectra .....     | 6 |

## 1. General

CO<sub>2</sub> was supplied by Beijing Analytical Instrument Factory with a purity of 99.99%. Zinc Iodide was supplied by Aladdin and was dried at 70 °C under vacuum for 24 h before used. Other solvents and substances were obtained commercially and were used as received. Standard column chromatography was performed on 200-300 mesh silica gel. NMR spectra were recorded on a Bruker Avance III HD 300 MHz NMR spectrometer (300 MHz for <sup>1</sup>H and 75 MHz for <sup>13</sup>C). Deuterated solvents chloroform-D (D, 99.8% +3% v/v TMS), dimethyl sulfoxide-d<sub>6</sub> (D, 99.9%) were purchased from Cambridge Isotope Laboratories, Inc., and were used without further purification.

## 2. Experimental Results

### 2.1 Figures S1-S3

Fig. S1 Optimization of catalyst amount.<sup>a</sup>

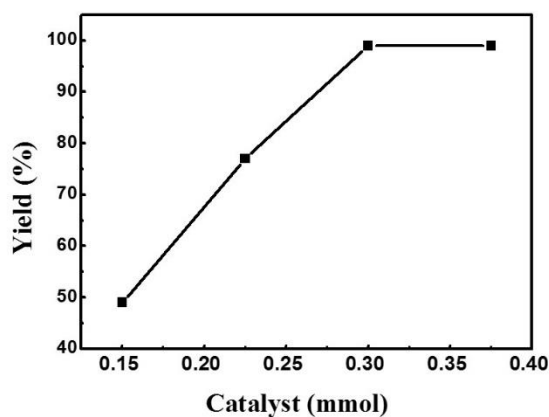

Typical reaction conditions were as follows: 1.5 mmol of **1a**, 1.5 mmol of triethylamine, different dosages of ZnI<sub>2</sub>, 30 °C, 1 MPa CO<sub>2</sub>, 14 h. <sup>a</sup>Yields were determined by <sup>1</sup>H NMR spectroscopy using 1,3,5-trioxane as an internal standard.

**Fig. S2** Optimization of reaction pressure.<sup>a</sup>

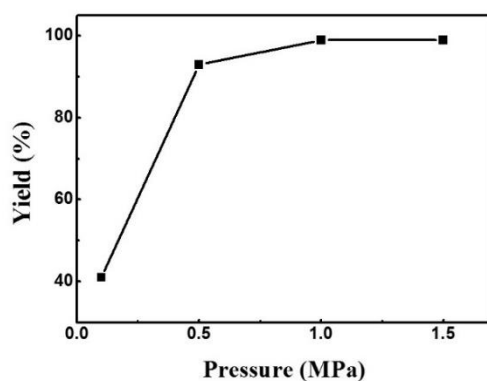

Typical reaction conditions were as follows: 1.5 mmol of **1a**, 1.5 mmol of triethylamine, 0.3 mmol of ZnI<sub>2</sub>, different reaction pressure, 30 °C, 14h. <sup>a</sup>Yields were determined by <sup>1</sup>H NMR spectroscopy using 1,3,5-trioxane as an internal standard.

**Fig. S3** <sup>1</sup>H NMR spectra of **1a**, **1a**/NEt<sub>3</sub>, **1a**/ZnI<sub>2</sub>, **1a**/DBU, **1a**/ZnI<sub>2</sub>/NEt<sub>3</sub>. ([D<sub>6</sub>]DMSO, 298 K).

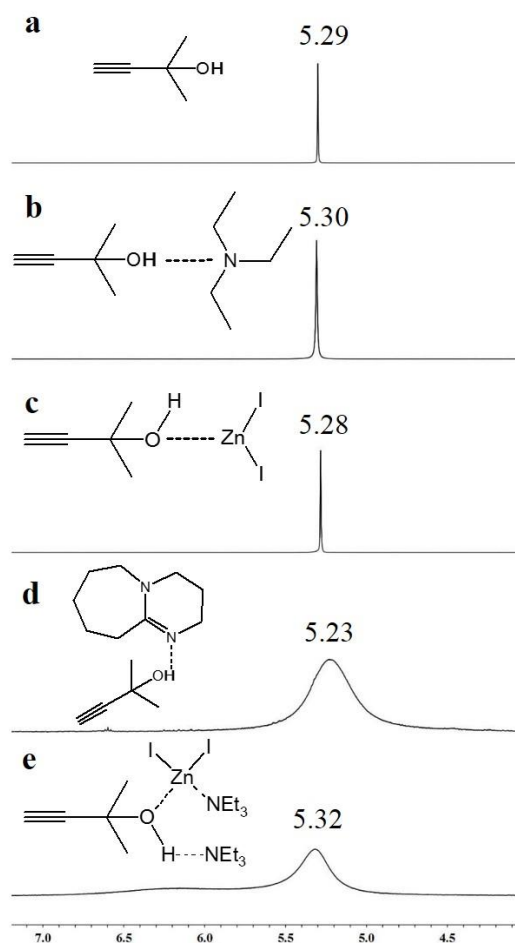

## 2.2. Products

**Typical procedure for the synthesis of  $\alpha$ -alkylidene cyclic carbonates.** As an example, the procedure using **1a** as the substrate was described, and those for other substrates were similar. **1a** (1.5 mmol), triethylamine (1.5 mmol), ZnI<sub>2</sub> (0.3 mmol) were loaded into a 22 mL stainless-steel batch reactor equipped with a magnetic stirrer. The air in the reactor was removed by blowing CO<sub>2</sub> into the reactor. Then the pressure of CO<sub>2</sub> was kept at 1 MPa. The reactor was placed in a constant temperature water bath and the reaction mixture was stirred for desired time. After the reaction, the reactor was placed in ice water for 20 minutes and CO<sub>2</sub> was vented slowly. Then dichloromethane (5 mL) was added in the reaction mixture. After removing precipitate by centrifuging, the reaction mixture was washed with water, dried over Na<sub>2</sub>SO<sub>4</sub> and filtered. The solvent was removed under vacuum to afford the product. The product **2e** was obtained by silica gel column chromatography (ethyl acetate:petroleum ether = 1:30).

**data:**

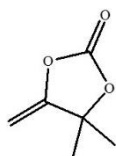

**4,4-Dimethyl-5-methylene-[1,3]dioxolan-2-one (2a).** colorless oil. <sup>1</sup>H NMR (300 MHz, CDCl<sub>3</sub>)  $\delta$  4.73 (d,  $J$  = 4.0 Hz, 1H), 4.30 (d,  $J$  = 4.0 Hz, 1H), 1.59 (s, 6H). <sup>13</sup>C NMR (75 MHz, CDCl<sub>3</sub>)  $\delta$  158.75, 151.22, 85.25, 84.63, 27.51.

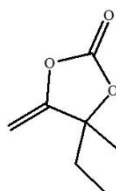

**4-Ethyl-4-methyl-5-methylene-[1,3]dioxolan-2-one (2b).** light yellow oil; <sup>1</sup>H NMR (300 MHz, CDCl<sub>3</sub>)  $\delta$  4.78 (d,  $J$  = 3.9 Hz, 1H), 4.25 (d,  $J$  = 3.9 Hz, 1H), 1.89 (dq,  $J$  = 14.7, 7.4 Hz, 1H), 1.73 (dq,  $J$  = 14.6, 7.4 Hz, 1H), 1.55 (s, 3H), 0.95 (t,  $J$  = 7.4 Hz, 3H). <sup>13</sup>C NMR (75 MHz, CDCl<sub>3</sub>)  $\delta$  157.42, 151.53, 87.60, 85.56, 33.36, 25.92, 7.30.

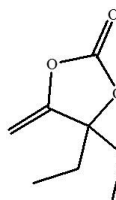

**4,4-Diethyl-5-methylene-[1,3]dioxolan-2-one (2c).** light yellow oil; <sup>1</sup>H NMR (300 MHz, CDCl<sub>3</sub>)  $\delta$  4.85 (d,  $J$  = 3.8 Hz, 1H), 4.22 (d,  $J$  = 3.8 Hz, 1H), 1.92 (dq,  $J$  = 14.6, 7.3 Hz, 2H), 1.70 (dq,  $J$  = 14.7, 7.4 Hz, 2H), 0.96 (t,  $J$  = 7.4 Hz, 6H). <sup>13</sup>C NMR (75 MHz, CDCl<sub>3</sub>)  $\delta$  155.79, 151.85, 90.85, 85.80, 31.89, 7.09.

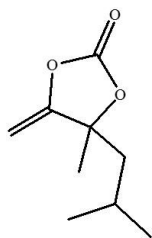

**4-Isobutyl-4-methyl-5-methylene-[1,3]dioxolan-2-one (2d).** light yellow oil;  $^1\text{H}$  NMR (300 MHz,  $\text{CDCl}_3$ )  $\delta$  4.77 (d,  $J = 3.9$  Hz, 1H), 4.26 (d,  $J = 3.9$  Hz, 1H), 1.88-1.73 (m, 2H), 1.68-1.60 (m, 1H), 1.56 (s, 3H), 1.01-0.89 (m, 6H).  $^{13}\text{C}$  NMR (75 MHz,  $\text{CDCl}_3$ )  $\delta$  158.32, 151.45, 87.33, 85.56, 48.51, 26.99, 24.28, 23.96, 23.66.

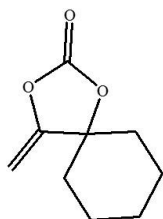

**4-Methylene-1,3-dioxaspiro[4.5]decan-2-one (2e).** colorless oil;  $^1\text{H}$  NMR (300 MHz,  $\text{CDCl}_3$ )  $\delta$  4.74 (d,  $J = 3.8$  Hz, 1H), 4.28 (d,  $J = 3.8$  Hz, 1H), 2.08-1.91 (m, 2H), 1.85-1.51 (m, 7H), 1.40-1.17 (m, 1H).  $^{13}\text{C}$  NMR (75 MHz,  $\text{CDCl}_3$ )  $\delta$  158.75, 151.48, 86.40, 85.49, 36.50, 24.34, 21.62.

### 3. NMR Spectra

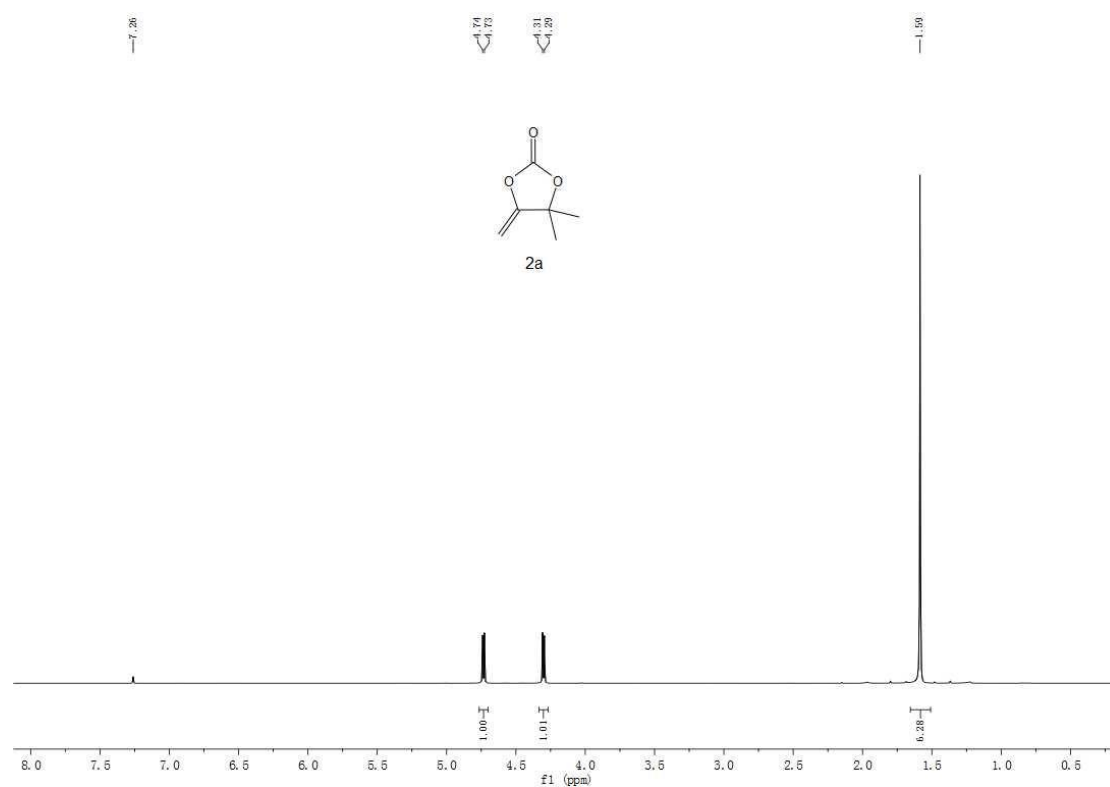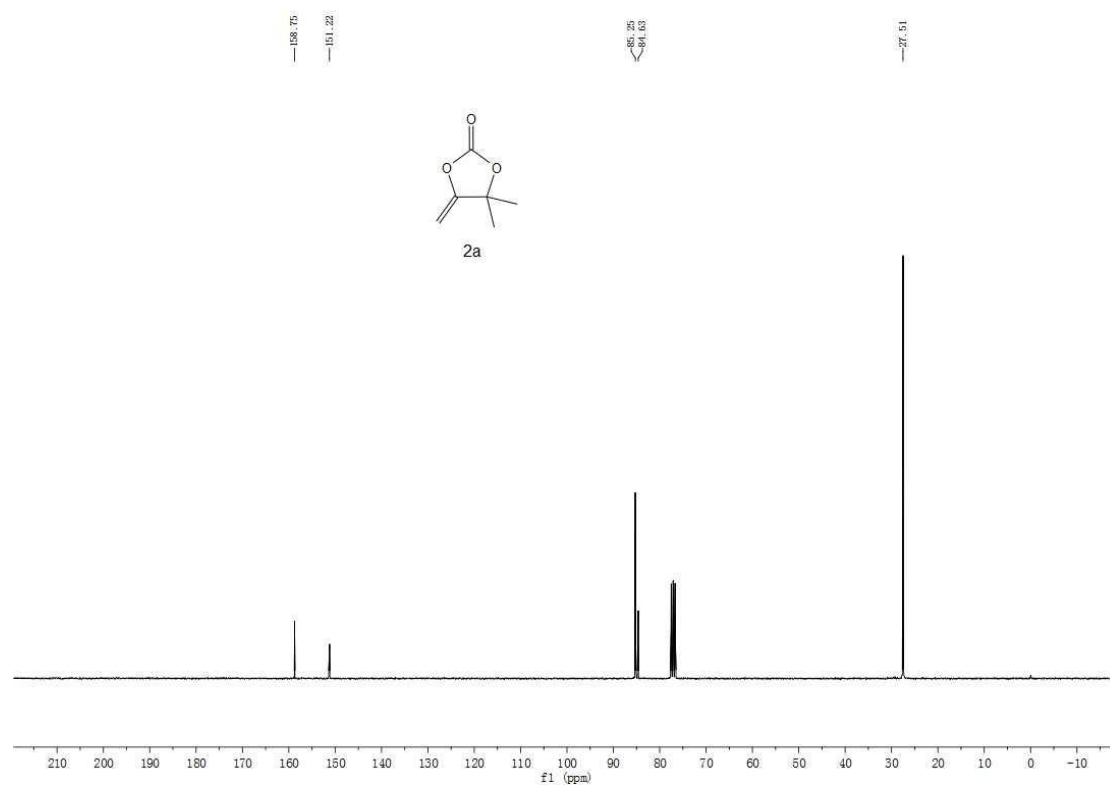

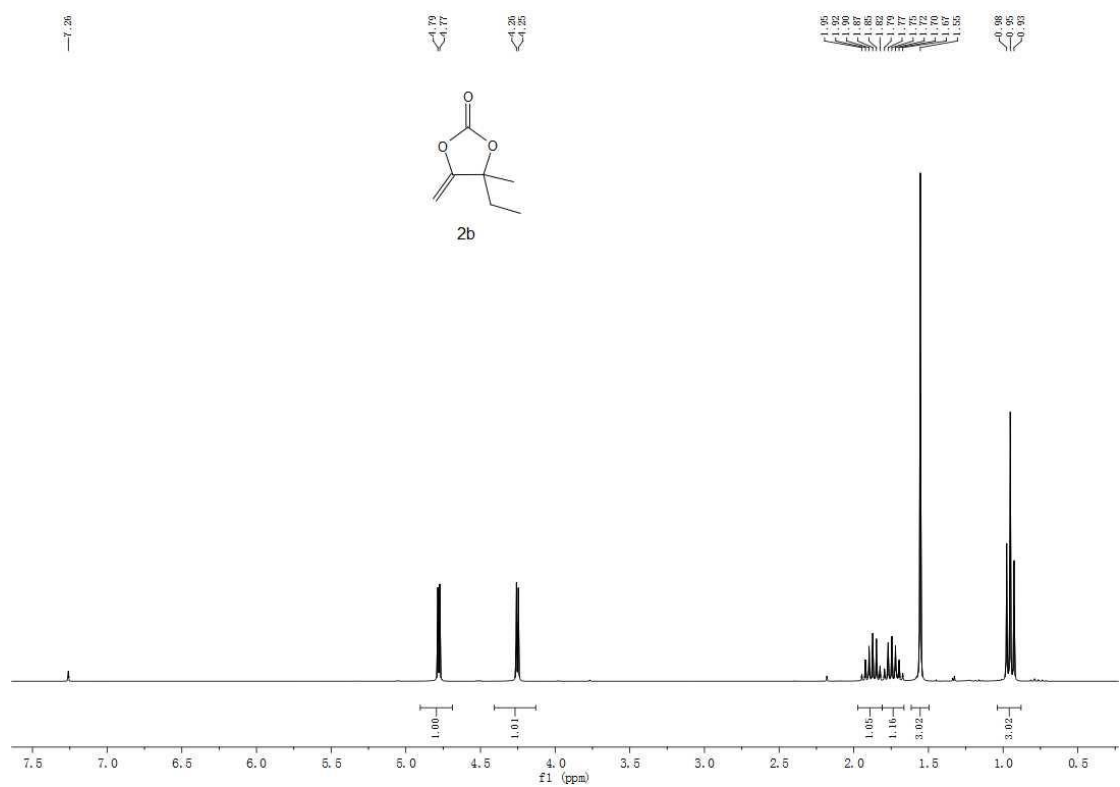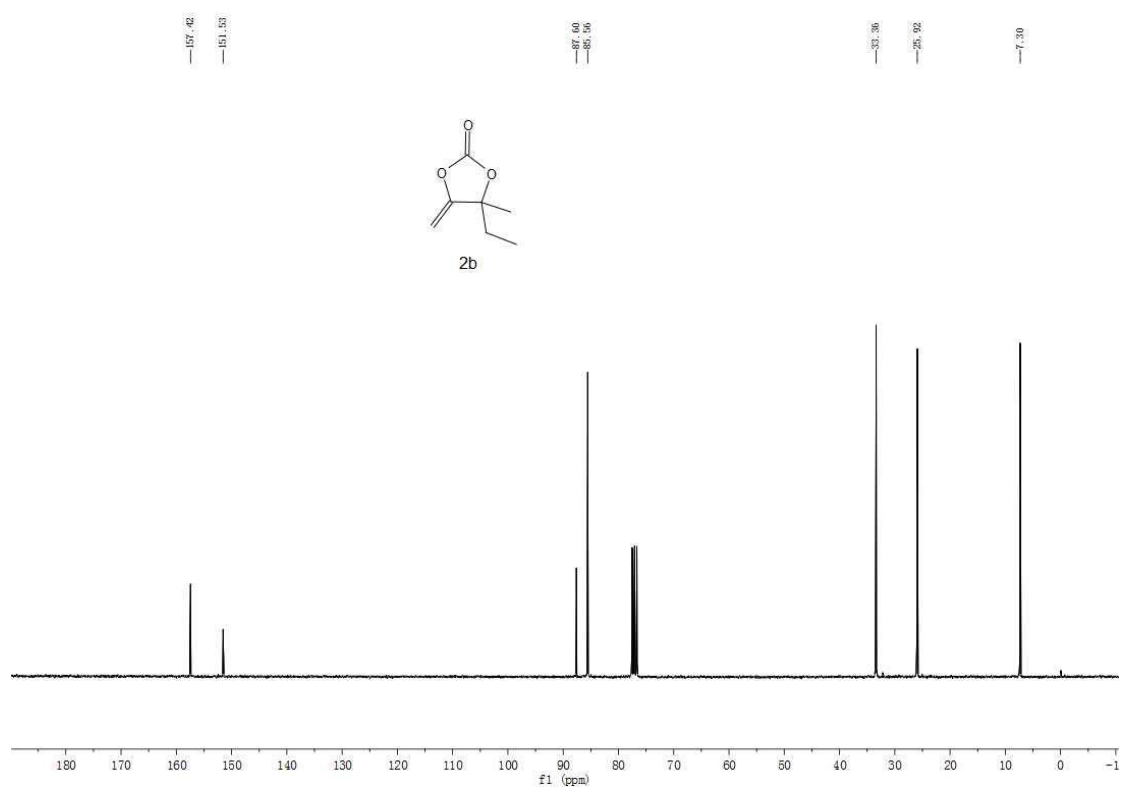

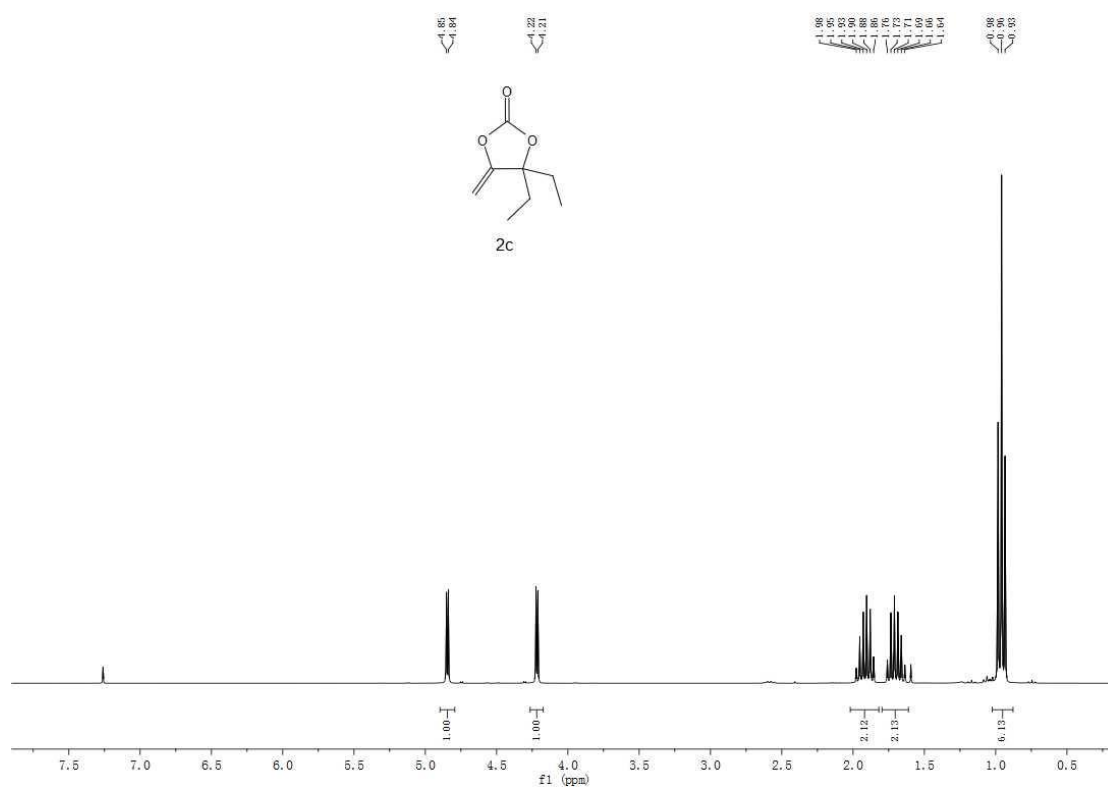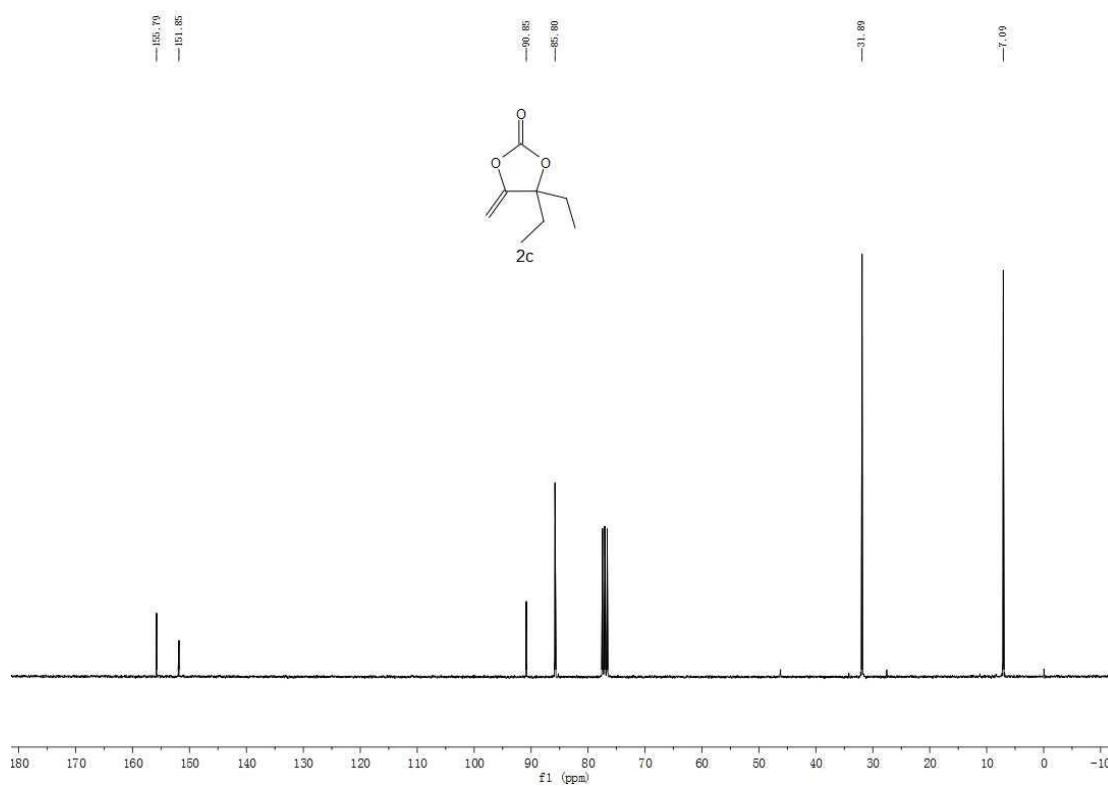

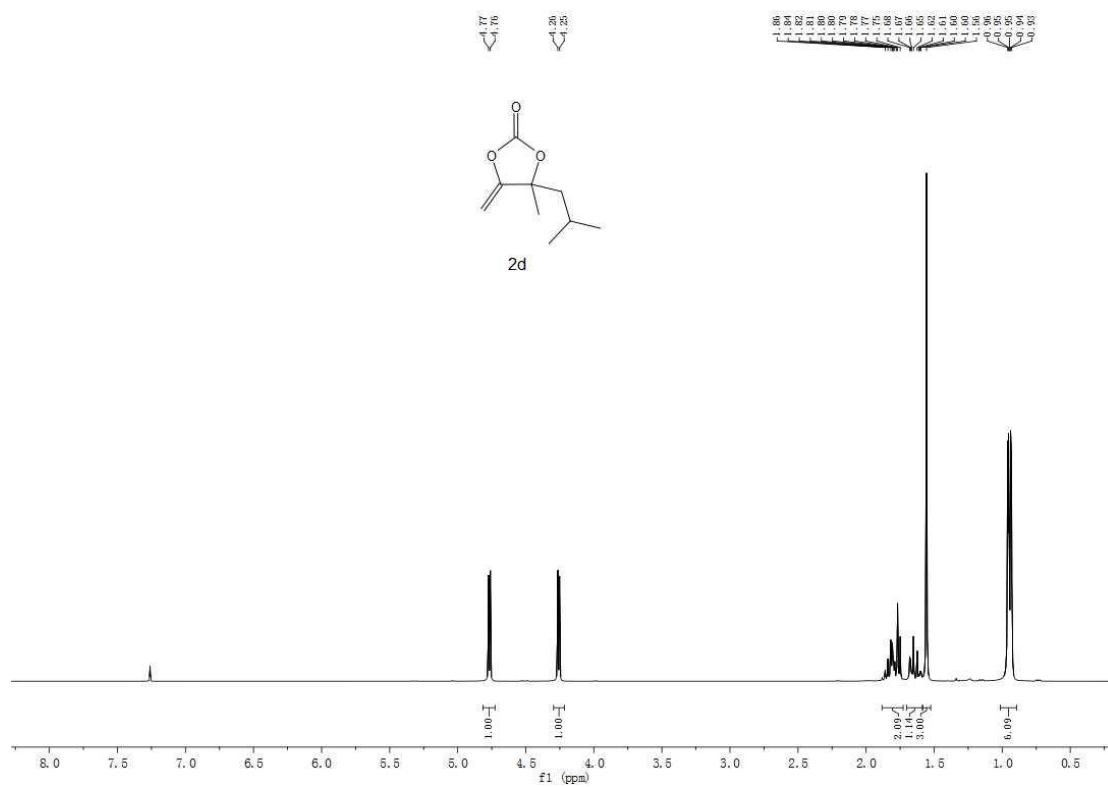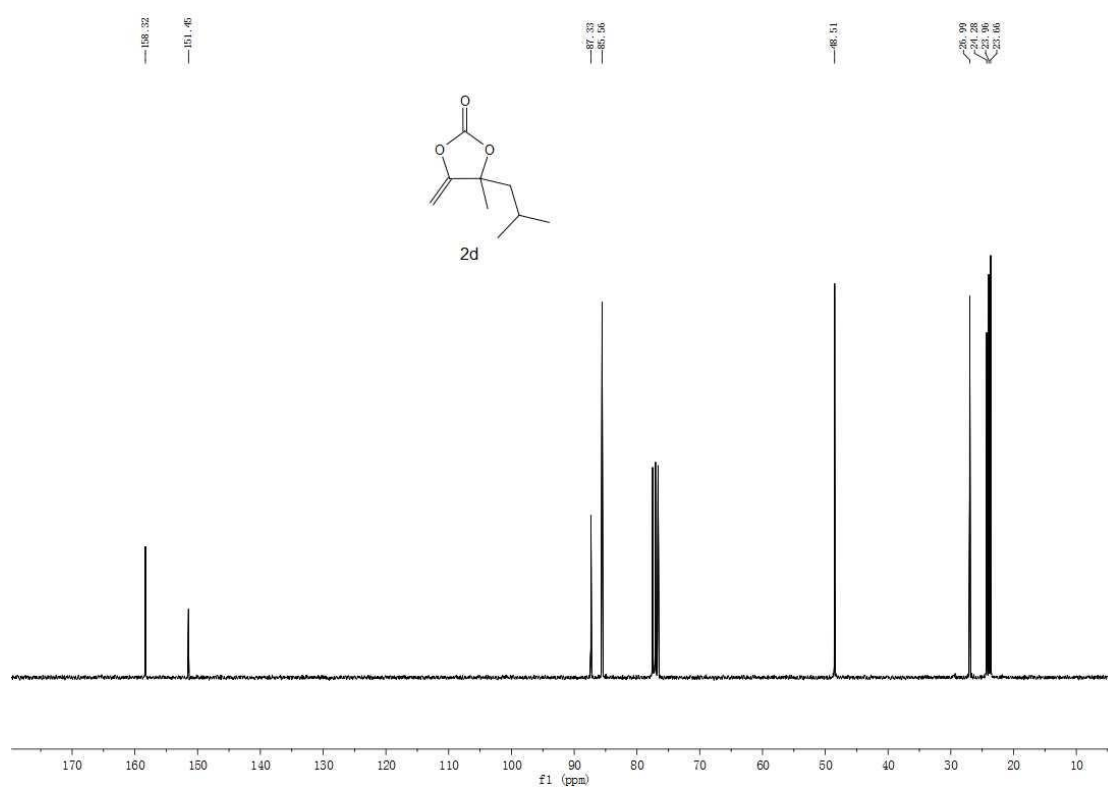

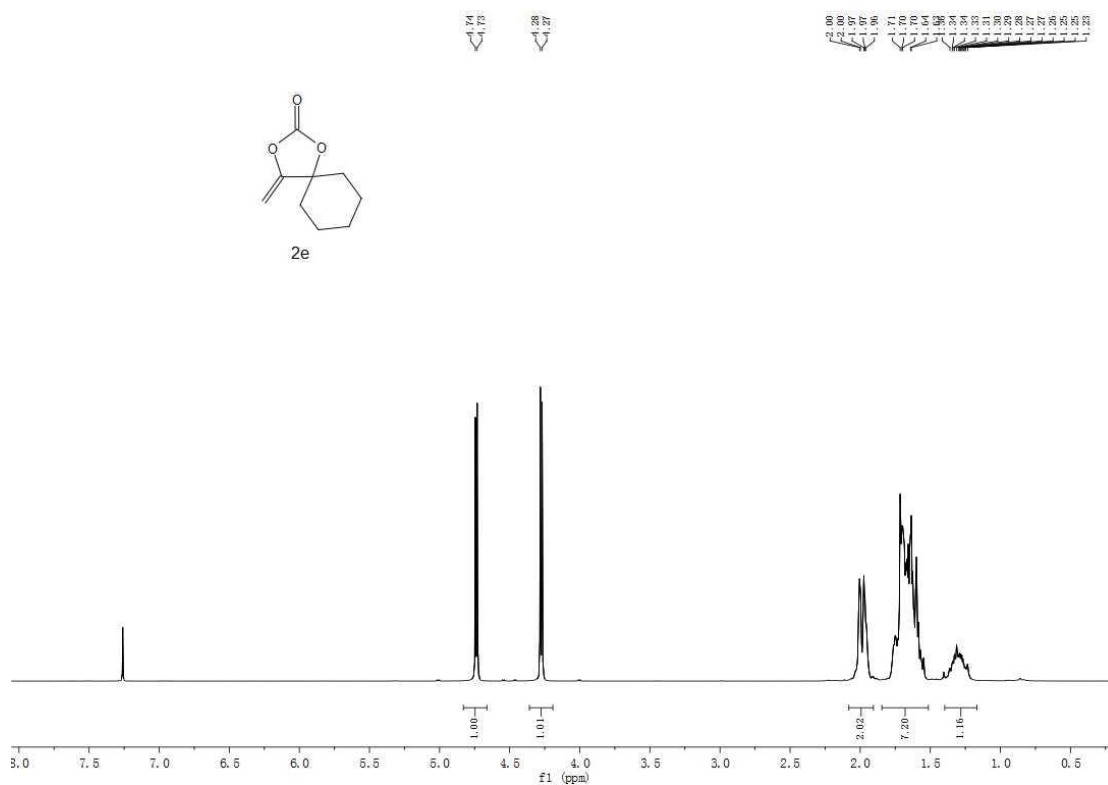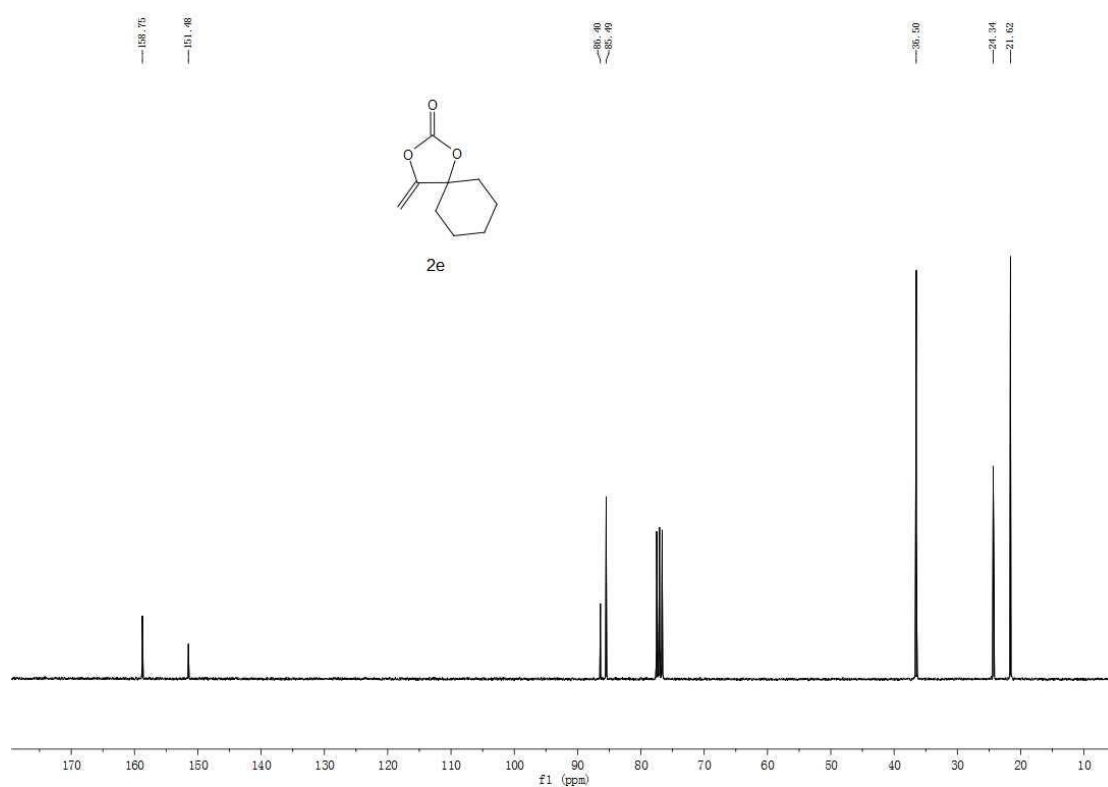

Supplement: c5gc01870f1.pdf [file c5gc01870f1.pdf]
